# Supplementary material
Source: Springer Nature journal article supplement (https://www.springermedizin.de/resource/supplementary/13054_2008_7625_MOESM4_ESM.pdf/9730180)

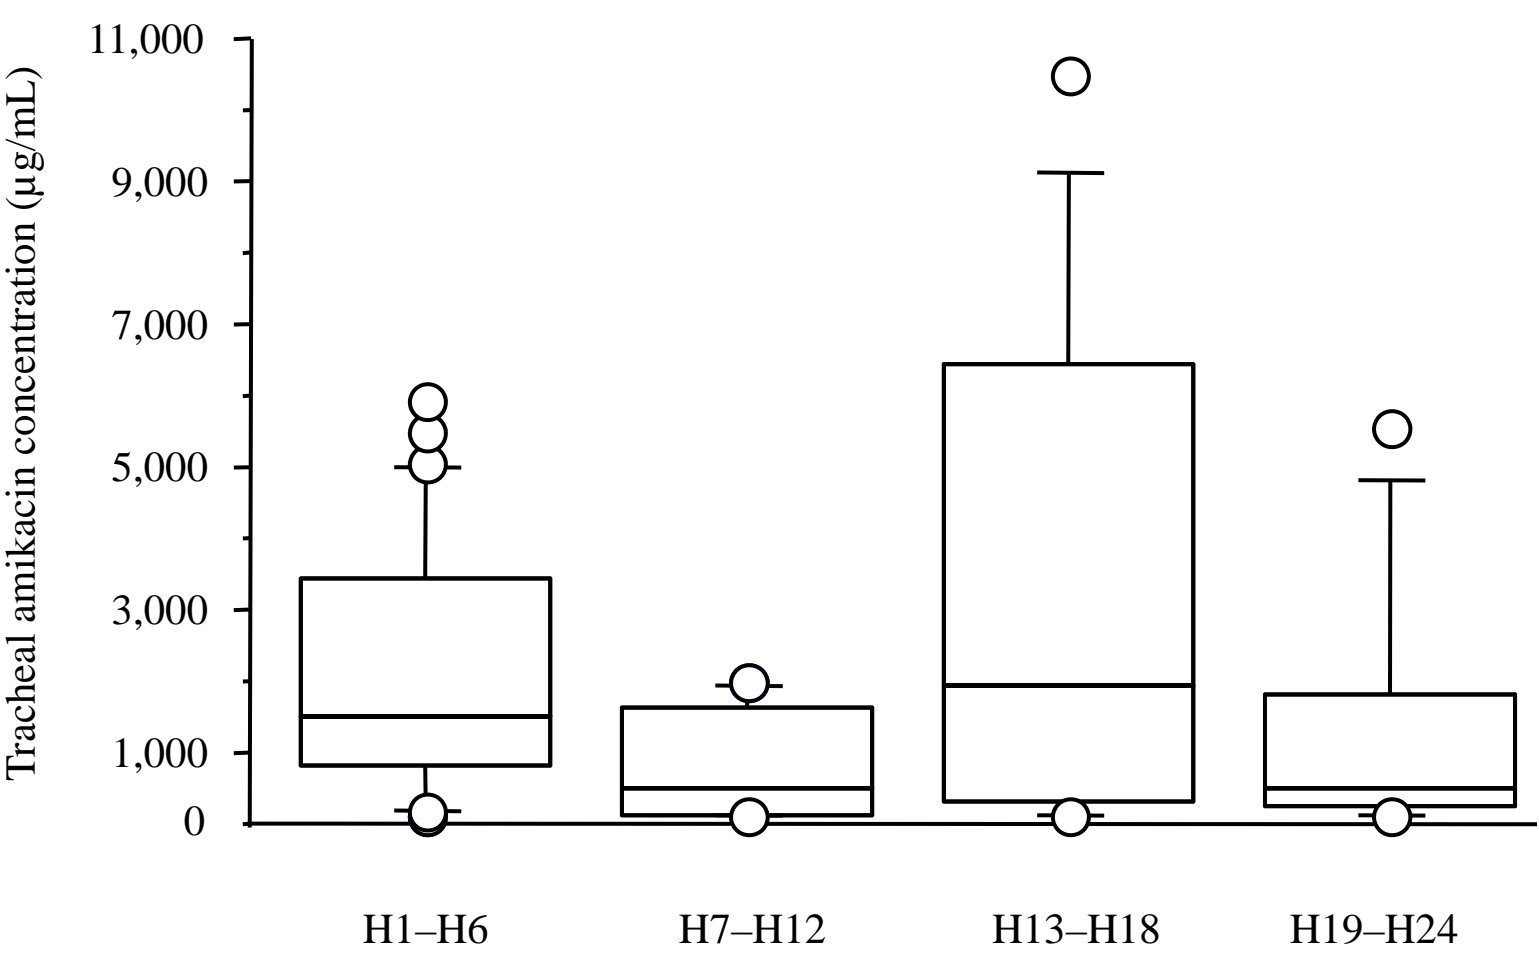

Supplement: MOESM4 [file 9730180]
